# Supplementary material for: Effects of Exotic and Native Earthworms on Soil Micro-Decomposers in a Subtropical Forest: A Field Mesocosm Experiment
Source: MDPI journal article supplement (doi:10.3390/f13111924), 2022-11-16
Supplement: s1 [file s1]

**Table S1.** Descriptive statistics of soil chemical properties, soil microbial community characteristics and nematode community characteristics.

|                                 |                  | Mean  | standard deviation | standard error | The 95% execution interval of the mean |             |
|---------------------------------|------------------|-------|--------------------|----------------|----------------------------------------|-------------|
|                                 |                  |       |                    |                | lower limit                            | upper limit |
| pH                              | CK               | 3.27  | 0.11               | 0.05           | 3.14                                   | 3.41        |
|                                 | Exotic earthworm | 3.47  | 0.18               | 0.08           | 3.24                                   | 3.69        |
|                                 | Native earthworm | 3.31  | 0.32               | 0.14           | 2.91                                   | 3.72        |
| SM                              | CK               | 0.58  | 0.15               | 0.07           | 0.40                                   | 0.77        |
|                                 | Exotic earthworm | 0.55  | 0.14               | 0.06           | 0.37                                   | 0.72        |
|                                 | Native earthworm | 0.57  | 0.11               | 0.05           | 0.43                                   | 0.70        |
| TC                              | CK               | 87.02 | 28.56              | 12.77          | 51.56                                  | 122.49      |
|                                 | Exotic earthworm | 75.76 | 17.71              | 7.92           | 53.78                                  | 97.75       |
|                                 | Native earthworm | 88.00 | 27.81              | 12.44          | 53.47                                  | 122.53      |
| TN                              | CK               | 2.57  | 0.68               | 0.30           | 1.73                                   | 3.41        |
|                                 | Exotic earthworm | 2.34  | 0.51               | 0.23           | 1.71                                   | 2.97        |
|                                 | Native earthworm | 2.65  | 0.66               | 0.30           | 1.83                                   | 3.47        |
| C/N                             | CK               | 33.31 | 3.26               | 1.46           | 29.26                                  | 37.36       |
|                                 | Exotic earthworm | 32.21 | 2.49               | 1.11           | 29.12                                  | 35.30       |
|                                 | Native earthworm | 32.73 | 3.90               | 1.75           | 27.88                                  | 37.58       |
| AP                              | CK               | 0.83  | 0.42               | 0.19           | 0.30                                   | 1.35        |
|                                 | Exotic earthworm | 0.43  | 0.20               | 0.09           | 0.18                                   | 0.67        |
|                                 | Native earthworm | 0.91  | 0.65               | 0.29           | 0.10                                   | 1.71        |
| NH <sub>4</sub> <sup>+</sup> -N | CK               | 15.92 | 13.96              | 6.24           | -1.42                                  | 33.25       |
|                                 | Exotic earthworm | 3.14  | 2.60               | 1.16           | -0.09                                  | 6.38        |
|                                 | Native earthworm | 12.44 | 9.24               | 4.13           | 0.97                                   | 23.92       |
| NO <sub>3</sub> <sup>-</sup> -N | CK               | 80.75 | 21.22              | 9.49           | 54.40                                  | 107.10      |
|                                 | Exotic earthworm | 39.29 | 16.87              | 7.54           | 18.35                                  | 60.24       |
|                                 | Native earthworm | 70.78 | 36.91              | 16.50          | 24.95                                  | 116.60      |
| G+ bacteria                     | CK               | 2.21  | 0.72               | 0.32           | 1.32                                   | 3.09        |
|                                 | Exotic earthworm | 2.12  | 0.31               | 0.14           | 1.74                                   | 2.51        |
|                                 | Native earthworm | 2.05  | 0.94               | 0.42           | 0.89                                   | 3.22        |

|                   |                  |        |        |       |        |        |
|-------------------|------------------|--------|--------|-------|--------|--------|
| G- bacteria       | CK               | 1.69   | 0.60   | 0.27  | 0.94   | 2.44   |
|                   | Exotic earthworm | 1.61   | 0.34   | 0.15  | 1.19   | 2.04   |
|                   | Native earthworm | 1.55   | 0.58   | 0.26  | 0.83   | 2.28   |
| G+/G-             | CK               | 1.33   | 0.12   | 0.05  | 1.18   | 1.48   |
|                   | Exotic earthworm | 1.34   | 0.10   | 0.05  | 1.21   | 1.47   |
|                   | Native earthworm | 1.30   | 0.15   | 0.07  | 1.12   | 1.49   |
| fungi             | CK               | 0.10   | 0.05   | 0.02  | 0.04   | 0.16   |
|                   | Exotic earthworm | 0.08   | 0.03   | 0.01  | 0.05   | 0.12   |
|                   | Native earthworm | 0.11   | 0.05   | 0.02  | 0.04   | 0.17   |
| Total Amount      | CK               | 8.68   | 2.87   | 1.28  | 5.12   | 12.24  |
|                   | Exotic earthworm | 8.03   | 1.29   | 0.57  | 6.43   | 9.62   |
|                   | Native earthworm | 7.82   | 3.07   | 1.37  | 4.00   | 11.63  |
| F/B               | CK               | 0.02   | 0.01   | 0.00  | 0.01   | 0.02   |
|                   | Exotic earthworm | 0.02   | 0.01   | 0.00  | 0.01   | 0.02   |
|                   | Native earthworm | 0.02   | 0.01   | 0.00  | 0.02   | 0.03   |
| Bacterivores (Ba) | CK               | 47.47  | 28.95  | 12.95 | 11.52  | 83.41  |
|                   | Exotic earthworm | 21.50  | 12.07  | 5.40  | 6.51   | 36.49  |
|                   | Native earthworm | 128.30 | 157.68 | 70.52 | -67.49 | 324.08 |
| Fungivores (Fu)   | CK               | 30.44  | 41.61  | 18.61 | -21.23 | 82.11  |
|                   | Exotic earthworm | 12.12  | 9.76   | 4.37  | 0.00   | 24.24  |
|                   | Native earthworm | 14.14  | 9.98   | 4.46  | 1.75   | 26.53  |
| O-P               | CK               | 4.09   | 4.75   | 2.13  | -1.81  | 9.99   |
|                   | Exotic earthworm | 3.42   | 4.14   | 1.85  | -1.73  | 8.57   |
|                   | Native earthworm | 3.83   | 6.43   | 2.88  | -4.15  | 11.81  |
| total             | CK               | 89.20  | 45.76  | 20.46 | 32.39  | 146.02 |
|                   | Exotic earthworm | 45.50  | 14.37  | 6.43  | 27.65  | 63.34  |
|                   | Native earthworm | 161.00 | 146.08 | 65.33 | -20.38 | 342.38 |
| Ba1               | CK               | 0.58   | 1.30   | 0.58  | -1.03  | 2.20   |
|                   | Exotic earthworm | 1.27   | 2.20   | 0.98  | -1.46  | 4.00   |
|                   | Native earthworm | 77.85  | 118.56 | 53.02 | -69.36 | 225.07 |
| Ba2               | CK               | 33.48  | 30.82  | 13.78 | -4.78  | 71.75  |

|       |                  |       |       |       |       |        |
|-------|------------------|-------|-------|-------|-------|--------|
| genus | Exotic earthworm | 6.31  | 6.40  | 2.86  | -1.63 | 14.26  |
|       | Native earthworm | 42.08 | 43.00 | 19.23 | -11.3 | 95.47  |
|       | CK               | 6.20  | 1.92  | 0.86  | 3.81  | 8.59   |
| EI    | Exotic earthworm | 4.25  | 1.48  | 0.66  | 2.41  | 6.09   |
|       | Native earthworm | 6.40  | 2.61  | 1.17  | 3.16  | 9.64   |
|       | CK               | 32.81 | 16.37 | 7.32  | 12.49 | 53.14  |
| SI    | Exotic earthworm | 56.31 | 18.81 | 8.41  | 32.95 | 79.67  |
|       | Native earthworm | 61.13 | 24.08 | 10.77 | 31.23 | 91.03  |
|       | CK               | 48.40 | 22.90 | 10.24 | 19.96 | 76.83  |
| MI    | Exotic earthworm | 74.66 | 22.44 | 10.03 | 46.80 | 102.51 |
|       | Native earthworm | 45.18 | 28.82 | 12.89 | 9.40  | 80.96  |
|       | CK               | 2.32  | 0.17  | 0.08  | 2.11  | 2.54   |
| NCR   | Exotic earthworm | 2.64  | 0.27  | 0.12  | 2.31  | 2.98   |
|       | Native earthworm | 2.05  | 0.59  | 0.26  | 1.32  | 2.78   |
|       | CK               | 0.66  | 0.30  | 0.13  | 0.29  | 1.03   |
| H'    | Exotic earthworm | 0.65  | 0.21  | 0.10  | 0.38  | 0.92   |
|       | Native earthworm | 0.71  | 0.26  | 0.12  | 0.38  | 1.03   |
|       | CK               | 1.42  | 0.41  | 0.18  | 0.91  | 1.94   |
|       | Exotic earthworm | 1.20  | 0.36  | 0.16  | 0.75  | 1.64   |
|       | Native earthworm | 1.41  | 0.43  | 0.19  | 0.87  | 1.95   |

**Table S2.** Results (ANOVA) on soil chemical properties.

| Treatment        |    |                  | P-values |       |       |       |       |       |                                 |                                 |
|------------------|----|------------------|----------|-------|-------|-------|-------|-------|---------------------------------|---------------------------------|
|                  |    |                  | Soil pH  | SM    | TC    | TN    | C/N   | AP    | NH <sub>4</sub> <sup>+</sup> -N | NO <sub>3</sub> <sup>-</sup> -N |
| Control          | vs | Exotic earthworm | 0.191    | 0.661 | 0.493 | 0.572 | 0.603 | 0.195 | 0.061                           | <b>0.029</b>                    |
| Control          | vs | Native earthworm | 0.771    | 0.836 | 0.952 | 0.844 | 0.782 | 0.782 | 0.585                           | 0.562                           |
| Native earthworm | vs | Exotic earthworm | 0.298    | 0.816 | 0.457 | 0.449 | 0.805 | 0.124 | 0.159                           | 0.084                           |

SM, soil moisture; TC, soil total carbon (g kg<sup>-1</sup> dry soil); TN, soil total nitrogen (g kg<sup>-1</sup> dry soil); C/N, carbon-to-nitrogen ratio; AP, available phosphorus (mg kg<sup>-1</sup> dry soil); NH<sub>4</sub><sup>+</sup>-N, nitrogen from ammonium (mg kg<sup>-1</sup> dry soil); NO<sub>3</sub><sup>-</sup>-N, nitrogen from nitrate (mg kg<sup>-1</sup> dry soil). Significant ( $P < 0.05$ ) effects were presented in bold.

**Table S3.** Results (ANOVA) on soil microbial community characteristics.

| Treatment        |    |                  | P-values       |                |                                |       |       |            |
|------------------|----|------------------|----------------|----------------|--------------------------------|-------|-------|------------|
|                  |    |                  | G <sup>+</sup> | G <sup>-</sup> | G <sup>+</sup> /G <sup>-</sup> | Fungi | F/B   | Total PLFA |
| Control          | vs | Exotic earthworm | 0.857          | 0.821          | 0.890                          | 0.503 | 0.528 | 0.691      |
| Control          | vs | Native earthworm | 0.733          | 0.693          | 0.743                          | 0.843 | 0.333 | 0.599      |
| Native earthworm | vs | Exotic earthworm | 0.871          | 0.866          | 0.642                          | 0.389 | 0.123 | 0.897      |

G<sup>+</sup>: G<sup>+</sup> bacteria; G<sup>-</sup>: G<sup>-</sup> bacteria; F/B, Fungi/(G<sup>+</sup> + G<sup>-</sup>).

**Table S4.** Soil nematode taxon list.

| Genus               | Guild | Treatments  |                  |                  |
|---------------------|-------|-------------|------------------|------------------|
|                     |       | Control     | Exotic earthworm | Native earthworm |
| Pristionchus        | Ba1   | 0.00±0.00   | 0.00±0.00        | 2.31±1.46        |
| Rhaditis            | Ba1   | 0.58±0.58   | 77.45±76.18      | 75.54±51.60      |
| Acrobeles           | Ba2   | 0.00±0.00   | 0.00±0.00        | 0.00±0.00        |
| Acrobelloides       | Ba2   | 31.76±14.41 | 6.04±2.51        | 39.74±19.87      |
| Cervidellus         | Ba2   | 0.00±0.00   | 1.70±1.70        | 0.74±0.74        |
| Eucephalobus        | Ba2   | 1.14±0.70   | 0.00±0.00        | 0.86±0.86        |
| Plectus             | Ba2   | 0.00±0.00   | 0.00±0.00        | 0.74±0.74        |
| Wilsonema           | Ba2   | 0.58±0.58   | 0.71±0.71        | 0.00±0.00        |
| Aphanolaimus        | Ba3   | 0.56±0.56   | 0.00±0.00        | 0.00±0.00        |
| Metaterratocephalus | Ba3   | 0.00±0.00   | 0.00±0.00        | 1.39±1.39        |
| Prismatolaimus      | Ba3   | 12.16±3.93  | 5.45±4.58        | 6.97±3.51        |
| Rhabdolaimus        | Ba3   | 0.68±0.68   | 4.94±4.94        | 0.00±0.00        |
| Alaimus             | Ba4   | 0.00±0.00   | 0.74±0.74        | 0.00±0.00        |
| Aphelenchoides      | Fu2   | 14.24±8.49  | 9.64±5.11        | 5.23±1.48        |
| Filenchus           | Fu2   | 16.20±10.65 | 6.85±4.15        | 8.90±3.81        |
| Miconchus           | Pr4   | 2.85±2.22   | 5.43±3.49        | 1.60±0.99        |
| Eudorylaimus        | Om4   | 0.68±0.68   | 0.00±0.00        | 0.00±0.00        |
| Thonus              | Om4   | 0.56±0.56   | 0.00±0.00        | 2.23±2.23        |
| Paractinolaimus     | Om5   | 0.00±0.00   | 0.00±0.00        | 0.00±0.00        |
| Prodorylaimus       | Om5   | 0.00±0.00   | 0.71±0.71        | 0.00±0.00        |
| Aglenchus           | He2   | 0.56±0.56   | 2.97±2.97        | 3.71±3.71        |
| Boleodorus          | He2   | 6.64±2.19   | 3.80±2.33        | 9.18±6.21        |

|                 |     |           |           |           |
|-----------------|-----|-----------|-----------|-----------|
| Tylenchidae     | He2 | 0.00±0.00 | 0.00±0.00 | 0.00±0.00 |
| Tylenchus       | He2 | 0.00±0.00 | 0.00±0.00 | 0.74±0.74 |
| Helicotylenchus | He3 | 0.00±0.00 | 0.00±0.00 | 1.11±1.11 |

values are means (ind/ 100 g dry soil) ± SE, n = 5. Guild designation is the composite of trophic group and *c-p* value; Ba: bacterivores; Fu: fungivores; Om: omnivores; Pr: predators; He: herbivores.

**Table S5.** Results (ANOVA) on nematode abundances.

| Treatment        |    |                  | P-values     |            |       |       |                 |                 |
|------------------|----|------------------|--------------|------------|-------|-------|-----------------|-----------------|
|                  |    |                  | Bacterivores | Fungivores | O-P   | Total | Ba <sub>1</sub> | Ba <sub>2</sub> |
| Control          | vs | Exotic earthworm | 0.666        | 0.275      | 0.841 | 0.451 | 0.988           | 0.188           |
| Control          | vs | Native earthworm | 0.194        | 0.329      | 0.937 | 0.225 | 0.100           | 0.666           |
| Native earthworm | vs | Exotic earthworm | 0.094        | 0.902      | 0.903 | 0.062 | 0.102           | 0.091           |

O-P, the sum of omnivores and predators; Ba<sub>x</sub> represents the functional guilds that reflect the nematode trophic group of bacterivores, x is the *c-p* value. No significant differences among treatments were found ( $P < 0.05$ ).

**Table S6.** Results (ANOVA) on nematode community characteristics.

| Treatment        |    |                  | P-values |              |       |               |       |           |
|------------------|----|------------------|----------|--------------|-------|---------------|-------|-----------|
|                  |    |                  | genus    | EI           | SI    | MI            | NCR   | <i>H'</i> |
| Control          | vs | Exotic earthworm | 0.160    | 0.088        | 0.121 | 0.213         | 0.952 | 0.392     |
| Control          | vs | Native earthworm | 0.880    | <b>0.045</b> | 0.842 | 0.285         | 0.785 | 0.957     |
| Native earthworm | vs | Exotic earthworm | 0.124    | 0.710        | 0.086 | <b>0.0314</b> | 0.739 | 0.421     |

EI, Enrichment index; SI, Structure index; MI, Maturity index; NCR, nematode channel ratio; *H'*, Shannon-Wiener index. Significant ( $P < 0.05$ ) effects were presented in bold.
